# Supplementary material
Source: MDPI journal article supplement (https://www.mdpi.com/2073-4395/12/2/258)
Supplement: s1 [file s1]

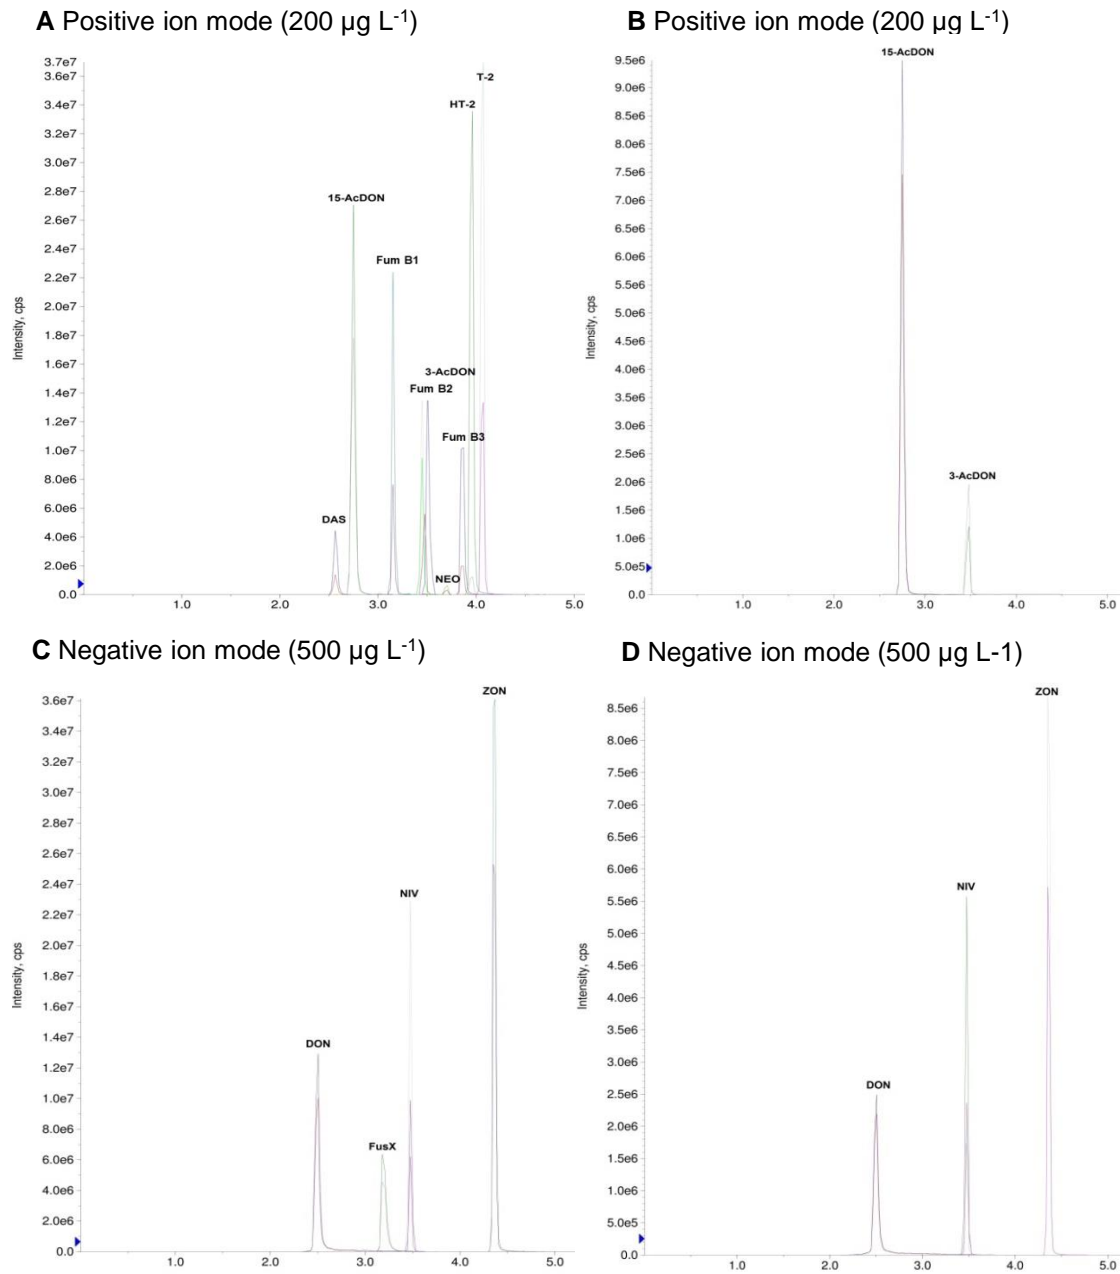

Figure S1. Chromatogram of mycotoxin standards (**A,C**) and wheat sample under herbicidal treatment in 2020 (**B,D**).
