# Supplementary material
Source: MDPI journal article supplement (https://www.mdpi.com/2073-4395/12/2/258)
Supplement: s1 [file s1]

**Table S1.** Results of ANOVA in examined parameters during four years of the study.

| Examined parameter      | Sum of Squares (SS) | Mean Square (MS) | F-value | P-value  |
|-------------------------|---------------------|------------------|---------|----------|
| <b>2017</b>             |                     |                  |         |          |
| Yield                   | 8.059               | 1.612            | 3.537   | 0.021    |
| Ergosterol              | 31.002              | 6.200            | 3.241   | 0.029    |
| Septoria tritici blotch | 10.207              | 8.427            | 5.760   | 0.037    |
| Eyespot                 | 333.109             | 66.624           | 1.210   | 0.344    |
| Sharp eyespot           | 378.196             | 75.639           | 0.562   | 0.728    |
| <i>Fusarium</i> spp.    | 56.000              | 17.950           | 4.140   | 0.041    |
| Sum of mycotoxins       | 9612.570            | 1922.510         | 7.204   | 0.0007   |
| DON                     | 2.010               | 0.402            | 3.296   | 0.028    |
| 3-AcDON                 | -                   | -                | -       | -        |
| 15-AcDON                | 9913.02             | 1982.60          | 7.578   | 0.00055  |
| NIV                     | -                   | -                | -       | -        |
| ZON                     | 3.597               | 0.719            | 0.267   | 0.925    |
| Fum B1                  | 25.408              | 5.082            | 7.185   | 0.000743 |
| Fum B2                  | 29.543              | 5.909            | 7.741   | 0.000488 |
| HT-2                    | 1.200               | 0.240            | 74.534  | 0.0001   |
| <b>2018</b>             |                     |                  |         |          |
| Yield                   | 9.581               | 1.916            | 34.840  | 0.0001   |
| Ergosterol              | 5.258               | 1.052            | 3.686   | 0.0180   |
| Septoria tritici blotch | 35.189              | 7.038            | 3.288   | 0.028    |
| Eyespot                 | 69.350              | 12.730           | 5.870   | 0.038    |
| Sharp eyespot           | 82.540              | 18.320           | 7.650   | 0.043    |
| <i>Fusarium</i> spp.    | 23.710              | 4.840            | 4.010   | 0.032    |
| Sum of mycotoxins       | 1557363             | 311473           | 19.201  | 0.000001 |
| DON                     | 1313.493            | 262.699          | 16.530  | 0.000004 |
| 3-AcDON                 | 10250.290           | 2050.060         | 6.543   | 0.001    |
| 15-AcDON                | 128664.200          | 25732.800        | 15.922  | 0.000005 |
| NIV                     | 499699              | 99940            | 6.673   | 0.001    |
| ZON                     | 3381.893            | 676.379          | 4.858   | 0.005    |
| Fum B1                  | -                   | -                | -       | -        |
| Fum B2                  | -                   | -                | -       | -        |
| HT-2                    | -                   | -                | -       | -        |
| <b>2019</b>             |                     |                  |         |          |
| Yield                   | 6.490               | 1.298            | 9.410   | 0.000153 |
| Ergosterol              | 3.369               | 0.674            | 0.780   | 0.577    |
| Septoria tritici blotch | -                   | -                | -       | -        |
| Eyespot                 | 49.655              | 9.931            | 0.539   | 0.744    |
| Sharp eyespot           | 6.533               | 1.307            | 0.952   | 0.472    |
| <i>Fusarium</i> spp.    | 4.105               | 0.821            | 3.973   | 0.0133   |
| Sum of mycotoxins       | 1067030             | 213406           | 9.241   | 0.000171 |
| DON                     | 1817.713            | 363.543          | 4.230   | 0.010    |
| 3-AcDON                 | 3256.810            | 501.530          | 3.450   | 0.023    |
| 15-AcDON                | 109734.600          | 21946.900        | 5.990   | 0.00196  |
| NIV                     | 311814              | 62363            | 3.749   | 0.017    |
| ZON                     | 4135.390            | 827.080          | 2.750   | 0.041    |
| Fum B1                  | -                   | -                | -       | -        |
| Fum B2                  | -                   | -                | -       | -        |
| HT-2                    | -                   | -                | -       | -        |
| <b>2020</b>             |                     |                  |         |          |
| Yield                   | 3.940               | 0.788            | 6.444   | 0.00134  |
| Ergosterol              | 13.131              | 2.626            | 16.620  | 0.000003 |
| Septoria tritici blotch | -                   | -                | -       | -        |
| Eyespot                 | 25.280              | 5.060            | 4.532   | 0.00753  |
| Sharp eyespot           | 3.293               | 0.659            | 3.270   | 0.028    |
| <i>Fusarium</i> spp.    | 838.552             | 167.710          | 21.874  | 0.0001   |
| Sum of mycotoxins       | 1736473             | 347295           | 41.341  | 0.00001  |
| DON                     | 3076.445            | 615.289          | 6.102   | 0.00179  |
| 3-AcDON                 | 8391.870            | 1678.370         | 5.460   | 0.00314  |
| 15-AcDON                | 109148.400          | 21829.700        | 4.809   | 0.00575  |
| NIV                     | 585203              | 117041           | 9.044   | 0.0002   |
| ZON                     | 8758.590            | 1751.720         | 5.122   | 0.00428  |

|        |   |   |   |   |
|--------|---|---|---|---|
| Fum B1 | - | - | - | - |
| Fum B2 | - | - | - | - |
| HT-2   | - | - | - | - |

---
